# Supplementary material
Source: PubMed Central journal article supplement (PMC7492767)

## Supplementary Materials

**Supplementary Table 1. 95% Confidence interval and rate estimate for therapeutic proportions**

|                     | level  | rate estimate | Lower    | Upper   |
|---------------------|--------|---------------|----------|---------|
| sponsor             | I      | 0.01356       | 0.005615 | 0.03273 |
|                     | NI     | 0.004644      | 0.000938 | 0.02299 |
| preapprovalapproval | N      | 0.004452      | 0.000781 | 0.0254  |
|                     | Y      | 0.01414       | 0.006533 | 0.0306  |
| monocombo           | C      | 0.002421      | 0.000382 | 0.01534 |
|                     | M      | 0.026         | 0.01015  | 0.06658 |
| biomarker           | N      | 0.003743      | 0.001157 | 0.01211 |
|                     | Y      | 0.01682       | 0.004896 | 0.05779 |
| hema                | h      | 0.007195      | 0.001815 | 0.02852 |
|                     | s      | 0.00875       | 0.00331  | 0.02313 |
| drug class          | c      | 0.01364       | 0.002665 | 0.0698  |
|                     | i      | 0.002772      | 0.000358 | 0.02148 |
|                     | o      | 0.01369       | 0.002143 | 0.08746 |
|                     | t      | 0.007657      | 0.003341 | 0.01755 |
| year                | 2005   | 0.02568       | 0.006084 | 0.1084  |
|                     | 2006   | 0.005323      | 0.001519 | 0.01865 |
|                     | 2007   | 0.002619      | 0.00036  | 0.01907 |
|                     | 2008   | 0.01487       | 0.003543 | 0.06241 |
|                     | 2009   | 0.006629      | 0.001527 | 0.02877 |
|                     | 2010   | 0.007068      | 0.001376 | 0.0363  |
| single/mixed        | mixed  | 0.004355      | 0.001224 | 0.01549 |
|                     | single | 0.01446       | 0.004784 | 0.04368 |

**Supplementary Fig 1. Distribution of trial size**

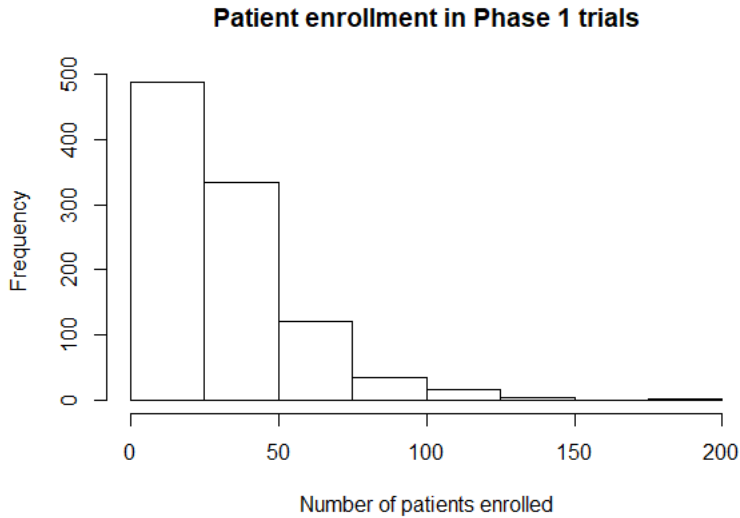

**Supplementary Fig 2. Survival curve of drugs given therapeutically**

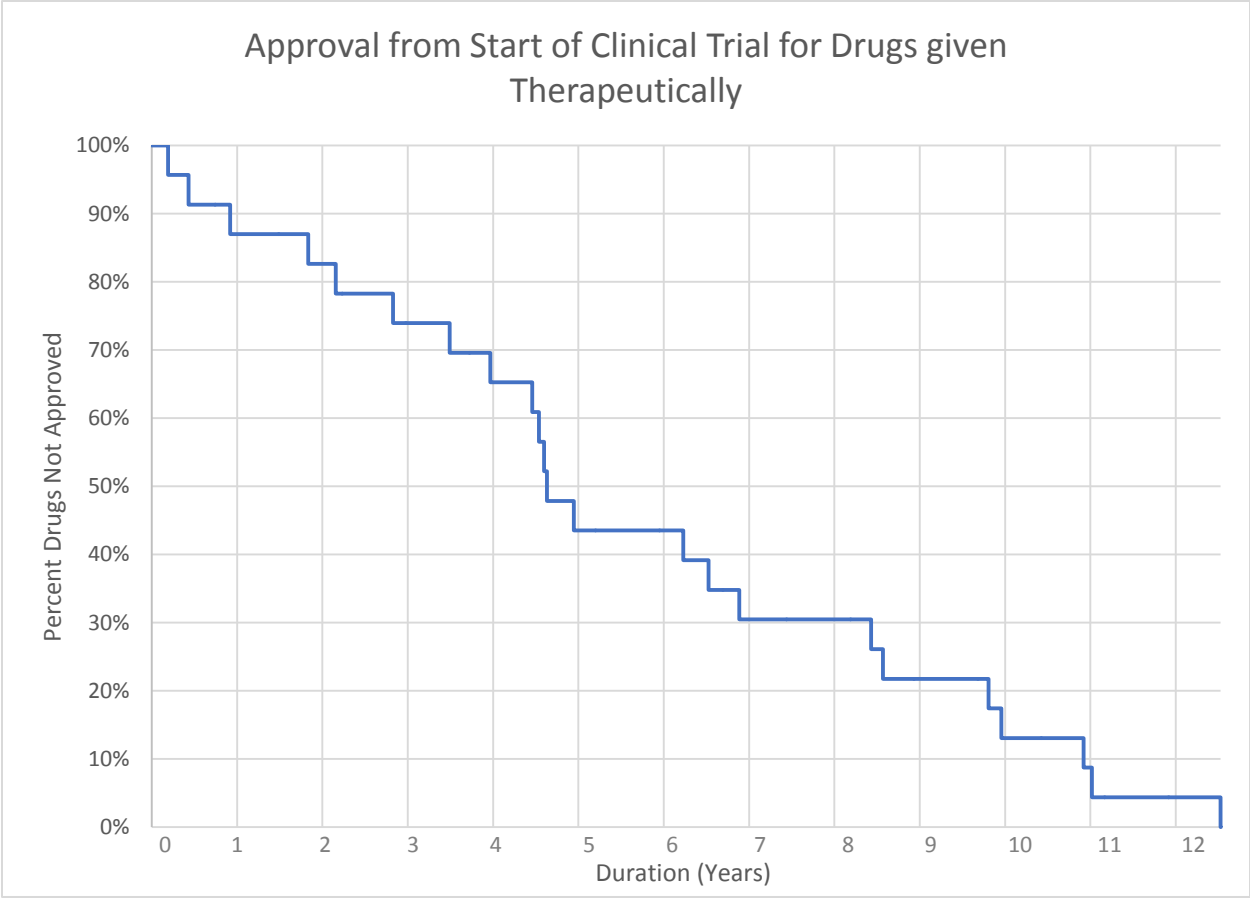

Supplement: djaa044_supplementary-data.pdf [file djaa044_supplementary-data.pdf]
